# Supplementary material for: Inhibitory effect of propolis on the development of AA amyloidosis
Source: PubMed Central journal article supplement — J Toxicol Pathol. 2017 Dec 24;31(2):89–93. doi: 10.1293/tox.2017-0044 (PMC5938209; doi:10.1293/tox.2017-0044), 2017-12-24
Supplement: tox-31-089-s001.pdf [file tox-31-089-s001.pdf]

Table S1. Sequences of primers used for real-time PCR.

| Target                          |                | Forward                 | Reverse                |
|---------------------------------|----------------|-------------------------|------------------------|
| Inflammatory cytokine           | IL-6           | TAGTCCTTCCTACCCCAATTTCC | TTGGTCCTTAGCCACTCCTTC  |
|                                 | IL-1 $\beta$   | GCAACTGTTTCCTGAACTCAACT | ATCTTTTGGGGTCCGTCAACT  |
|                                 | MCP-1          | TTAAAAACCTGGATCGGAACCA  | GCATTAGCTTCAGATTTACGGG |
|                                 | CAT            | CAGGTGCGGACATTCTAC      | TTGCGTTCTTAGGCTTCTC    |
|                                 | GPx1           | CAATCAGTTCGGACACCAGGAG  | TTCACCATTCACTTCGCACTTC |
| Oxidative stress-related factor | Prdx1          | TTCTTTTACCCTCTTGACTTT   | TCTTGGGTGTGTTAATCC     |
|                                 | SOD1           | GGTGAACCAGTTGTGTTGTC    | CCGTCTTTCCAGCAGTC      |
|                                 | SOD2           | GACCTGCCTTACGACTATG     | GAAGAGCGACCTGAGTTG     |
|                                 | GSR            | GGATTGGCTGTGATGAGATG    | CTGAAGAGGTAGGATGAATGG  |
| Housekeeping gene               | $\beta$ -actin | CCCTGGCTCCTAGACCAT      | AGAGCCACCAATCCACACAGA  |
